# Supplementary material for: Prognostic Value of Measurable Residual Disease in Patients with AML Undergoing HSCT: A Multicenter Study
Source: MDPI journal article supplement (doi:10.3390/cancers15051609), 2023-03-05
Supplement: s1 [file s1]

**Supplementary Table S1. The information per fluorochrome from QA program.**

|          | LAB_1                                       | LAB_3                      | LAB_4                                                                                         |
|----------|---------------------------------------------|----------------------------|-----------------------------------------------------------------------------------------------|
| 2015     |                                             |                            |                                                                                               |
| Round I  |                                             |                            | 25/33<br><i>CD4 PacB x3</i><br><i>CD5 PerCP5-5 x2</i><br><i>CD81 APCH7 x3</i>                 |
| Round II | 33/ 33                                      |                            | 30/33<br><i>CD4 PacB x2</i><br><i>CD81 APCH7 x1</i>                                           |
| 2016     |                                             |                            |                                                                                               |
| Round I  | 33/33                                       | 33/33                      | 30/33<br><i>IgK PE x3</i>                                                                     |
| Round II | 33/33                                       | 32/33<br><i>CD3-APC</i>    | 28/33<br><i>IgK PE x3</i><br><i>CD81 APCH7 x2</i>                                             |
| 2017     |                                             |                            |                                                                                               |
| Round I  | 31/33<br><i>IgK PE</i><br><i>CD81 APCH7</i> | 32/33<br><i>CD4-PacB</i>   | 29/33<br><i>CD4 PacB x1</i><br><i>CD81 APCH7 x3</i>                                           |
| Round II | 33/33                                       |                            | 25/33<br><i>CD45 PacO x2</i><br><i>CD56-PE x1</i><br><i>IgK PE x2</i><br><i>CD81 APCH7 x3</i> |
| 2018     |                                             |                            |                                                                                               |
| Round I  | 32/33<br><i>CD4 PacB</i>                    | 33/33                      | 33/33                                                                                         |
| Round II | 33/33                                       | 32/33<br><i>CD81-APCH7</i> | 32/33<br><i>CD4 PacB</i>                                                                      |
| 2019     |                                             |                            |                                                                                               |
| Round I  | 33/33                                       | 33/33                      | 33/33                                                                                         |
| Round II | 32/33<br><i>CD4 PacB</i>                    |                            | 33/33                                                                                         |

|                 |                                                   |                                                          |                                                             |
|-----------------|---------------------------------------------------|----------------------------------------------------------|-------------------------------------------------------------|
| <b>2020</b>     |                                                   |                                                          |                                                             |
| <b>Round I</b>  |                                                   |                                                          |                                                             |
| <b>Cyto 1</b>   | <b>32/33</b><br><i>CD38-APC-H7</i>                | <b>31/33</b><br><i>CD45 PacO</i><br><i>CD38 APCH7</i>    | <b>32/33</b><br><i>CD5 PerCP5-5</i>                         |
| <b>Cyto 2</b>   | <b>33/33</b>                                      |                                                          |                                                             |
| <b>Round II</b> |                                                   |                                                          |                                                             |
| <b>Cyto 1</b>   | <b>31/33</b><br><i>CD3-APC</i><br><i>CD4-PacB</i> | <b>29/33</b><br><i>CD4-PAcB x3</i><br><i>CD38-APC-H7</i> | <b>29/33</b><br><i>CD5 PerCP5-5 x3</i><br><i>CD3-APC x1</i> |
| <b>Cyto 2</b>   | <b>32/33</b><br><i>CD3-APC</i>                    |                                                          |                                                             |

**Supplementary Table S2. Designed panels to LAIP analysis**

| Combinations | Backbone                 | Different markers               |
|--------------|--------------------------|---------------------------------|
| 1            | HLADR, CD45, CD34, CD117 | CD15, CD13 or CD123, CD33, CD38 |
| 3            |                          | CD15, NG2, CD33, CD14           |
| 4            |                          | CD64, CD56, CD33, CD14          |
| 5            |                          | CD7, CD13, CD33, CD38           |
| 6            |                          | CD15, CD56, CD123, CD4          |
| 7            |                          | nuTdT, CD56, CD123, CD4         |
| 8            |                          | CD64, CD56, CD300e, CD14        |
| 9            |                          | CD15, CD33 or CD13, CD19, CD38  |
| 10           |                          | CD15, CD33 or CD13, CD7, CD38   |
| 11           |                          | CD36, CD13, CD11b, CD71         |
| 12           |                          | CD15, CD56, CD33, CD38          |
| 13           |                          | nuTdT, CD13, CD33, CD38         |
| 14           |                          | CD7, CD56, CD33, CD38           |
| 15           |                          | CD16, CD13, CD33, CD10          |
| 16           |                          | CD36, CD64, CD33, CD71          |
| 17           |                          | CD15, CD13, CD22, CD38          |

**Supplementary Table S3. Comparative analysis of MRD samples in the 4 laboratories: The table represents the MRD value determined by each laboratory.**

|         | <b>Lab 1</b> | <b>Lab 2</b> | <b>Lab 3</b> | <b>Lab 4</b> |
|---------|--------------|--------------|--------------|--------------|
| % MRD 1 | 0,54         | 0,55         | 0,39         | 0,54         |
| % MRD 2 | 0,024        | 0,03         | 0,04         | 0,022        |
| % MRD 3 | 0,27         | 0,24         | 0,23         | 0,18         |
| % MRD 4 | 0,028        | 0,02         | 0,03         | 0,023        |
| % MRD 5 | 0,002        | 0,003        | 0,005        | 0,002        |
| % MRD 6 | 0,004        | 0,005        | 0,01         | 0,005        |

MRD: measurable residual disease

**Supplementary Table S4. Univariate analysis of CIR, NRM, OS and LFS**

| Variable       | CIR<br>HR (95% CI)        | NRM<br>HR (95% CI)        | OS<br>HR (95% CI)         | LFS<br>HR (95% CI)         |
|----------------|---------------------------|---------------------------|---------------------------|----------------------------|
| Sex            |                           |                           |                           |                            |
| male           | 1.02 (0.67-1.55). p 0.927 | 1 (0.56-1.77) p 0.998     | 1.07 (0.73-1.57). p 0.728 | 1.02 (0.73-1.44). p 0.883  |
| Age            | 1.02 (1-1.04). p 0.037    | 1.02 (0.99-1.05). p 0.101 | 1.03 (1.01-1.04). p 0.002 | 1.02 (1.01-1.03). p 0.008  |
| Conditioning   |                           |                           |                           |                            |
| RIC            | 1.37 (0.9-2.1). p 0.147   | 1.29 (0.72-2.3). p 0.393  | 1.73 (1.18-2.53). p 0.005 | 1.43 (1.01-2.01). p 0.041  |
| Donor          |                           |                           |                           |                            |
| Unrelated      | 0.97 (0.63-1.51). p 0.91  | 2.04 (1.06-3.95). p 0.033 | 1.31 (0.87-1.97). p 0.196 | 1.29 (0.89-1.85). p 0.171  |
| Haploidentical | 0.45 (0.19-1.03). p 0.06  | 2.73 (1.16-6.42). p 0.021 | 1.15 (0.63-2.13). p 0.654 | 0.99 (0.56-1.75). p 0.981  |
| Depletion T    |                           |                           |                           |                            |
| Yes            | 0.86 (0.5-1.48). p 0.583  | 1.09 (0.53-2.27). p 0.812 | 0.96 (0.58-1.58). p 0.876 | 0.92 (0.59-1.43). p 0.707  |
| ELN2011        |                           |                           |                           |                            |
| Intermediate   | 2.11 (0.87-5.09). p 0.095 | 0.97 (0.40-2.38). p 0.948 | 1.41 (0.71-2.8). p 0.319  | 1.61 (0.86-2.98). p 0.134  |
| Adverse        | 4.88 (1.99-11.99). p 0.01 | 1.48 (0.56-3.90). p 0.429 | 3.26 (1.62-6.55). p 0.001 | 3.75 (1.98-7.09). p <0.001 |
| MRD ≥0.1       | 2.29 (1.43-3.65). p 0.001 | 1.54 (0.78-3.06). p 0.214 | 2.51 (1.64-3.83). p 0.000 | 2.29 (1.55-3.38). p 0.000  |

OS: overall survival; LFS: leukemia free survival HR: Hazard ratio; CI confidence interval; Myelo: myeloablative; RIC: reduce intensity conditioning; MRD: measurable residual disease; GVHD: Graf versus Host disease.

**Supplementary Table S5. OS and LFS according to multivariate time-dependent analysis (time-dependent variable GvHD):**

| <i>Variable</i>                 | <i>LFS</i>                         | <i>OS</i>                          |
|---------------------------------|------------------------------------|------------------------------------|
| Age                             | HR 1.01 [95% CI 0.99-1.03] p 0.218 | HR 1.01 [95% CI 0.99-1.03] p 0.152 |
| Conditioning                    |                                    |                                    |
| *Myelo/RIC                      | HR 1.38 [95% CI 0.91-2.09] p 0.130 | HR 1.68 [95% CI 1.05-2.68] p 0.029 |
| ELN_2011                        |                                    |                                    |
| *Intermediate                   | HR 1.8 [95% CI 0.95-3.45] p 0.072  | HR 1.56 [95% CI 0.76-3.19] p 0.222 |
| *Adverse                        | HR 3.43 [95% CI 1.76-6.7] p< 0.001 | HR 2.8 [95% CI 1.33-5.89] p 0.006  |
| MRD ≥0.1 before transplantation | 1.89 [95% CI 1.25-2.86] p 0.003    | HR 1.98 [95% CI 1.26-3.11] p 0.003 |
| GvHD                            | HR 0.81 [95% CI 0.52-1.27] p0.366  | HR 0.88 95% CI 0.53-1.45] p 0.608  |

CIR: cumulative incidence of relapse; NRM: non-relapse mortality; OS: overall survival; LFS: leukemia free survival; HR: Hazard ratio; CI confidence interval; Myelo: myeloablative; RIC: reduce intensity conditioning; MRD: measurable residual disease; GvHD: Graf versus Host disease.

**Supplementary Table S6. Evolution of patients who did not relapse with positive MRD prior to transplantation.**

|    | Type                 | Status disease at transplantation  | aGvHD   | cGVHD    | MRD after | Last follow-up      | Cause         |
|----|----------------------|------------------------------------|---------|----------|-----------|---------------------|---------------|
| 1  | AML NPM1             | 1 <sup>st</sup> CR MRD 0.66%       | Grade 2 | NO       | 0,02%     | DEATH (6 m)         | VOD           |
| 2  | AML NOS              | Aplasia 2.4% blasts                | Grade 4 | Severe   | NO        | DEATH (3 y 1 m)     | Unknown       |
| 3  | AML CEBPA            | 1 <sup>st</sup> CR MRD 0.12%       | NO      | mild     | NO        | ALIVE (4 y 2 m)     |               |
| 4  | AML NPM1             | 1 <sup>st</sup> CR MRD 0.51%       | Grade 1 | mild     | NO        | ALIVE (3y 10m)      |               |
| 5  | AML NOS (IDH2)       | 1 <sup>st</sup> CR MRD 0.15%       | Grade 2 | -        | -         | DEATH (3m)          | Pneumonia     |
| 6  | AML NOS WT1          | 1 <sup>st</sup> CR MRD 0.01%       | Grade 2 | mild     | NO        | ALIVE (2y 9 m)      |               |
| 7  | AML NOS ASXL1        | 1 <sup>st</sup> CR MRD 0.21%       | Grade 4 | -        | 0.26%     | DEATH (2m)          | aGVHD         |
| 8  | TRML                 | 1 <sup>st</sup> CR MRD 0.3%        | Grade 1 | NO       | NO        | ALIVE (2 y y 6 m)   |               |
| 9  | AML KMT2             | 1 <sup>st</sup> CR MRD (4.27%)     | Grade 2 | NO       | NO        | ALIVE (2 y y 9 m)   |               |
| 10 | AML -7               | Aplasia (3.1% blasts)              | Grade 1 | Mild     | NO        | ALIVE (2 y y 1 mes) |               |
| 11 | AML MCR (FLT3 0,13%) | 1 <sup>st</sup> CR MRD (0.2%)      |         |          | NO        | ALIVE (1 año y 7 m) |               |
| 12 | AML NOS              | 1 <sup>st</sup> CR MRD (0.2%)      | Grade 1 |          | NO        | DEATH (6 m)         | Pneumonia     |
| 13 | AML t(6;9)           | 1 <sup>st</sup> CR con MRD (1.04%) | Grade 1 | Mild     | NO        | ALIVE (1 año y 3 m) |               |
| 14 | AML NOS WT1          | 1 <sup>st</sup> CR con MRD (0.11%) | Grade 2 |          | NO        | ALIVE (1 año y 3 m) |               |
| 15 | AML MCR FLT3         | Active disease (10% blasts)        |         |          | NO        | ALIVE (1 año y 2 m) |               |
| 16 | AML NOS +7           | 1 <sup>st</sup> CR con MRD (0.08%) | Grade 1 | -        | NO        | DEATH (7 m)         | Acute abdomen |
| 17 | AML NPM1             | 1 <sup>st</sup> CR con MRD (0.1%)  | Grade 2 |          | NO        | ALIVE (10 m)        |               |
| 18 | AML MCR KMT2A        | 1 <sup>st</sup> CR con MRD (0.02%) | Grade 2 |          | NO        | ALIVE (10 m)        |               |
| 19 | AML CEBPA            | 1 <sup>st</sup> CR con MRD (0.7%)  | Grade 2 | -        | NO        | ALIVE (3 m)         |               |
| 20 | AML t(9;11)          | 2 <sup>nd</sup> CR con MRD (0.5%)  |         |          | -         | ALIVE (2.6 m)       |               |
| 21 | AML CRMD             | 1 <sup>st</sup> CR con MRD (2.2%)  | Grade 1 | Moderate | NO        | DEATH (8 m)         | Infection     |
| 22 | AML NPM/FLT3         | 2 <sup>nd</sup> CR (0.2%)          |         |          | NO        | ALIVE (5 y y 8 m)   |               |
| 23 | AML inv16            | 2 <sup>nd</sup> CR (0.08%)         | Grade 2 |          | NO        | ALIVE (5 y y 6 m)   |               |
| 24 | AML NOS              | 1 <sup>st</sup> CR (0.01%)         | Grade 1 | Mild     | NO        | ALIVE (5 y)         |               |

|    |                                 |                                |         |                    |                  |                 |                           |
|----|---------------------------------|--------------------------------|---------|--------------------|------------------|-----------------|---------------------------|
| 25 | AML del(20)(q12)                | 1 <sup>st</sup> CR MRD (0.4%)  |         | Mild               | NO               | ALIVE (5y 6 m)  |                           |
| 26 | AML MCR (-7)                    | 1 <sup>st</sup> CR MRD (0.6%)  |         |                    | 3% IS withdrawal | DEATH (6 m)     | Infection<br>MRD elevated |
| 27 | AML MCR RUNX1                   | 1 <sup>st</sup> CR MRD (0.4%)  | Grade 4 |                    |                  | DEATH (2 m)     | Infection                 |
| 28 | AML IDH2                        | 1 <sup>st</sup> CR MRD (0.01%) | Grade 1 | Severe             | 5% IS withdrawal | ALIVE (2 y)     |                           |
| 29 | AML MCR t(16;17)                | 1 <sup>st</sup> CR MRD (0.03%) | -       | -                  | -                | DEATH (<1m)     | Infection                 |
| 30 | AML IDH2                        | 1 <sup>st</sup> CR MRD (0.01%) |         |                    |                  | ALIVE (2y 7 m)  |                           |
| 31 | AML FLT3/NPM                    | 1 <sup>st</sup> CR MRD (0.02%) | Grade 2 | Moderate           |                  | ALIVE (1y 3m)   |                           |
| 32 | AML IDH                         | 2 <sup>nd</sup> CR MRD (2.1%)  |         |                    |                  | ALIVE (9 m)     |                           |
| 33 | AML RUNX1/RUNX1T( KIT mutation) | 1 <sup>st</sup> CR MRD (0.69%) | Grade 2 |                    |                  | DEATH (3 m)     | Infection                 |
| 34 | AML CBFB/MYH11                  | 1 <sup>st</sup> CR MRD (0.04%) |         | Severe             | NO               | ALIVE (4y 3 m)  |                           |
| 35 | AML CBFB/MYH11                  | 1 <sup>st</sup> CR MRD (0.3%)  | yes     | Severe (after ILD) | NO               | DEATH (1y 11m)  | GVHD                      |
| 36 | AML 47XX                        | 1 <sup>st</sup> CR MRD 0.05%   | Grade 2 | -                  | NO               | DEATH (8 m)     | Septic shock              |
| 37 | AML MCR                         | 1 <sup>st</sup> CR MRD (0.22%) |         | Mild               |                  | DEATH (2y 5 m)  | Ureteral neoplasm         |
| 38 | AML del(7q)                     | 1 <sup>st</sup> CR MRD (1%)    | Grade 2 |                    |                  | ALIVE (2 y 5 m) |                           |
| 39 | AML CBFB/MYH11                  | 1 <sup>st</sup> CR MRD (0.3%)  |         |                    | NO               | ALIVE (2 y 4 m) |                           |
| 40 | AML NPM1                        | 2 <sup>nd</sup> CR MRD (0.2%)  | Grade 4 | Severe             | 0.2%             | ALIVE (2y 2 m)  |                           |
| 41 | AML NPM1                        | 2 <sup>nd</sup> CR MRD (0.01%) |         |                    | Yes              | ALIVE (4y 5m)   |                           |
| 42 | AML t(7;13)                     | CR MRD (0.04%)                 | Grade 2 | Extensive          | -                | ALIVE (1y 2 m)  |                           |
| 43 | AML NOS                         | CR MRD (0.01%)                 | Grade 1 | Extensive          | -                | ALIVE (2 y)     |                           |
| 44 | AML NOS                         | CR MRD (0.16%)                 |         | Extensive          | -                | ALIVE (4 y)     |                           |
| 45 | AML 47,XX, del(9)               | CR MRD (0.13%)                 | Grade 2 |                    | -                | ALIVE (4 y)     |                           |
| 46 | AML 46XX                        | CR MRD (0.12%)                 |         | Extensive          | -                | ALIVE (5y 2 m)  |                           |

AML: acute myeloid leukemia; NOS: Not otherwise specified; CR: complete remission; MRD: measurable residual disease; GvHD: Graf versus Host disease.
